# Supplementary material for: A sensitive method for the quantification of short-chain fatty acids by benzyl chloroformate derivatization combined with GC-MS
Source: Royal Society of Chemistry journal article supplement (doi:10.1039/d0an00005a), 2020-01-01

Electronic Supplementary Material (ESI) for Analyst.  
This journal is © The Royal Society of Chemistry 2020

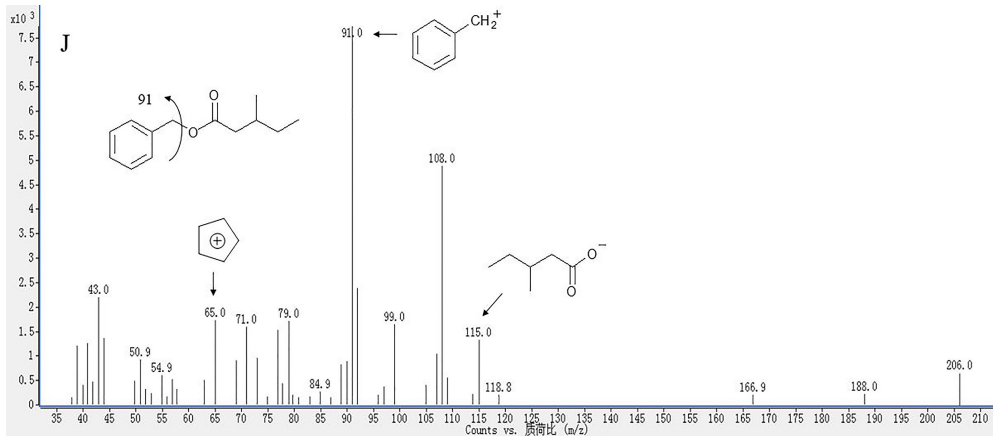

Supplement: d0an00005a12.pdf [file d0an00005a12.pdf]
