# Supplementary figures and images for: A sensitive method for the quantification of short-chain fatty acids by benzyl chloroformate derivatization combined with GC-MS
Source: Royal Society of Chemistry journal article supplement (doi:10.1039/d0an00005a), 2020-01-01

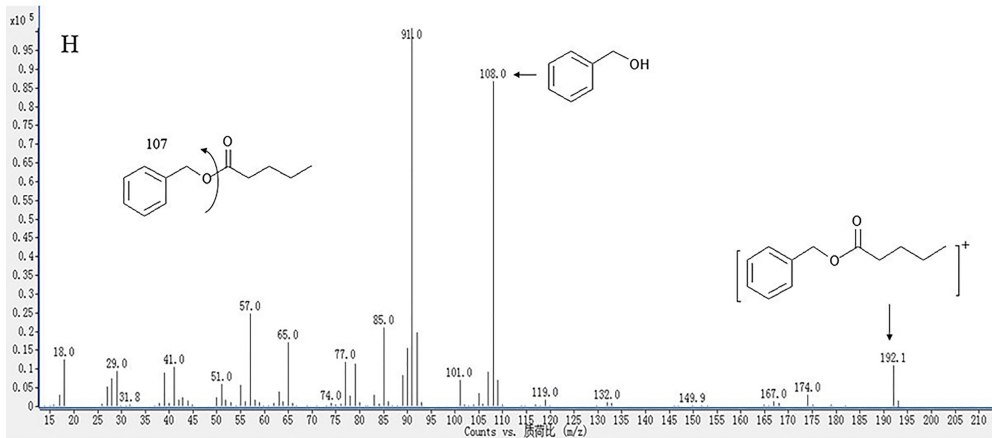

Supplement: d0an00005a10.pdf [file d0an00005a10.pdf]

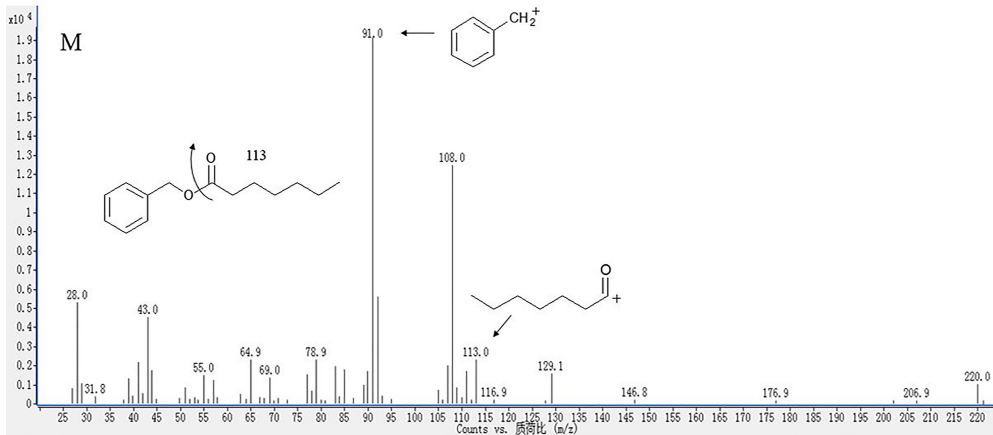

Supplement: d0an00005a15.pdf [file d0an00005a15.pdf]

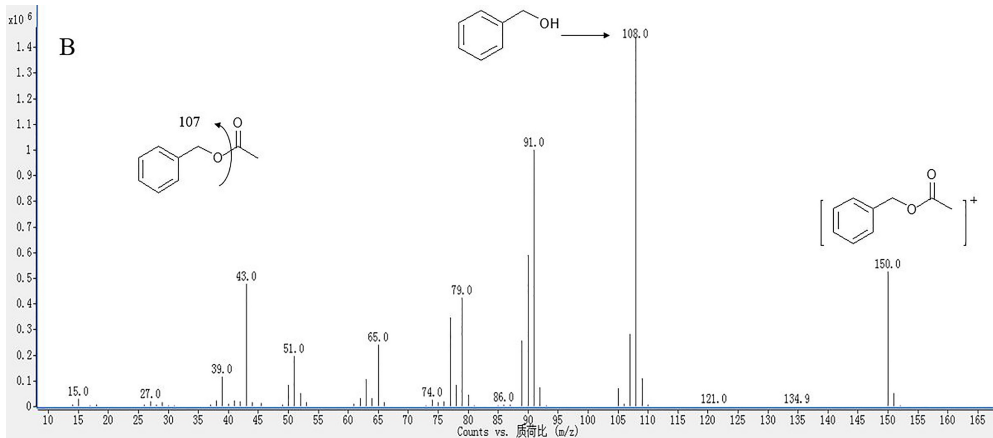

Supplement: d0an00005a4.pdf [file d0an00005a4.pdf]

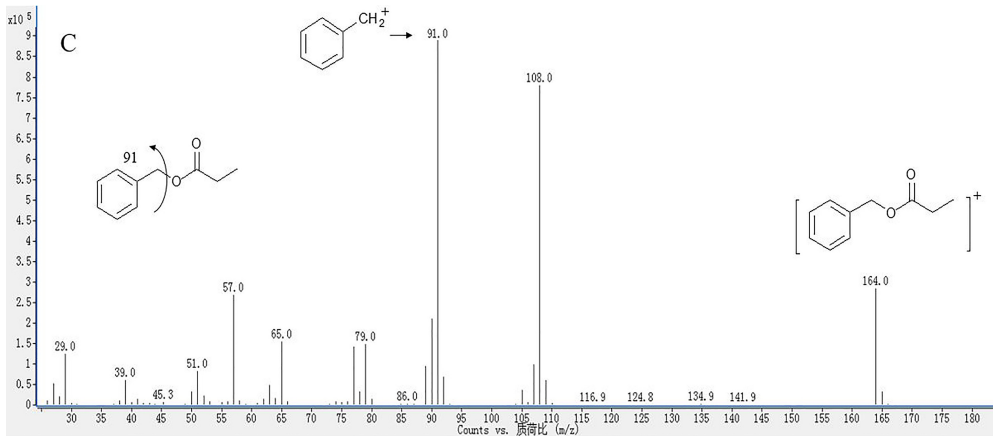

Supplement: d0an00005a5.pdf [file d0an00005a5.pdf]

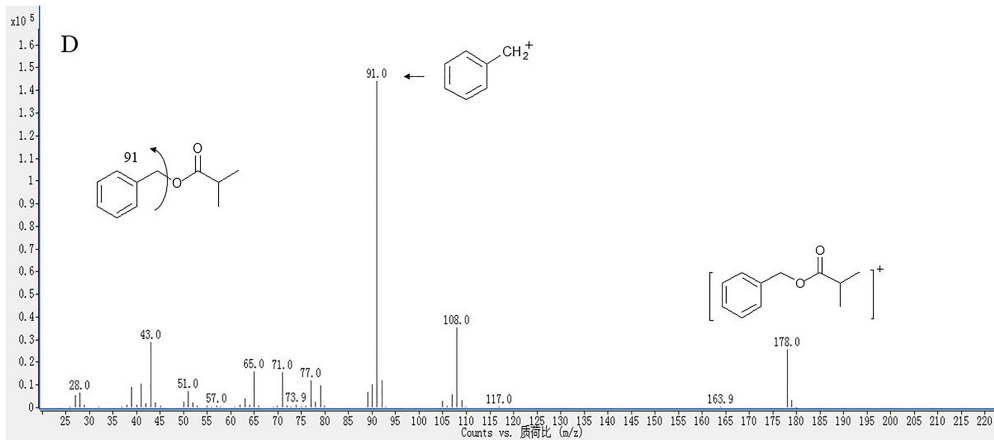

Supplement: d0an00005a6.pdf [file d0an00005a6.pdf]

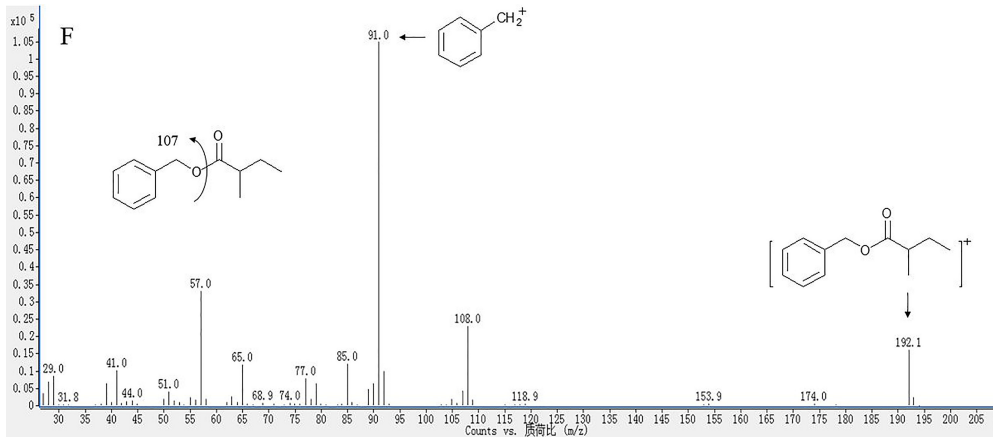

Supplement: d0an00005a8.pdf [file d0an00005a8.pdf]

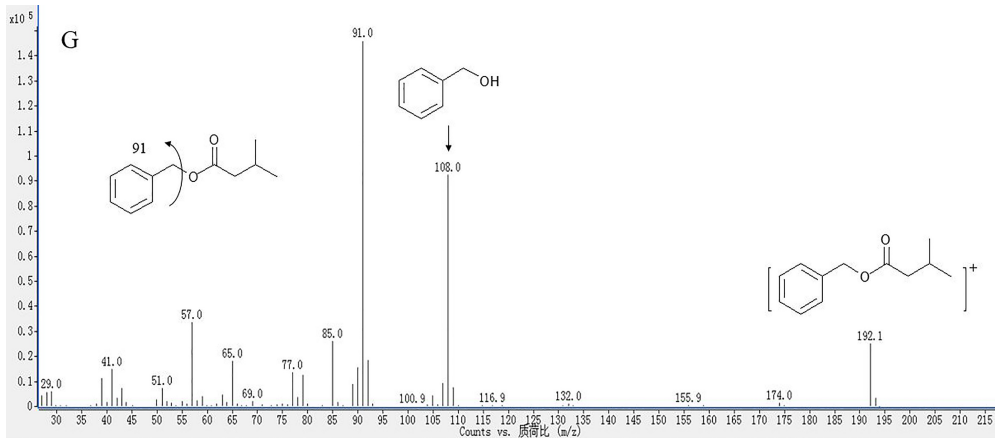

Supplement: d0an00005a9.pdf [file d0an00005a9.pdf]
